# Supplementary material for: The TSPO-NOX1 axis controls phagocyte-triggered pathological angiogenesis in the eye
Source: PubMed Central journal article supplement (PMC7264151; doi:10.1038/s41467-020-16400-8), 2020-06-01
Supplement: 41467_2020_16400_MOESM1_ESM.pdf [file 41467_2020_16400_MOESM1_ESM.pdf]

## Supplementary information

### **The TSPO-NOX1 axis controls phagocyte-triggered pathological angiogenesis in the eye**

Wolf. et al.

Supplementary Figures 1-13

### Supplementary Figure 1

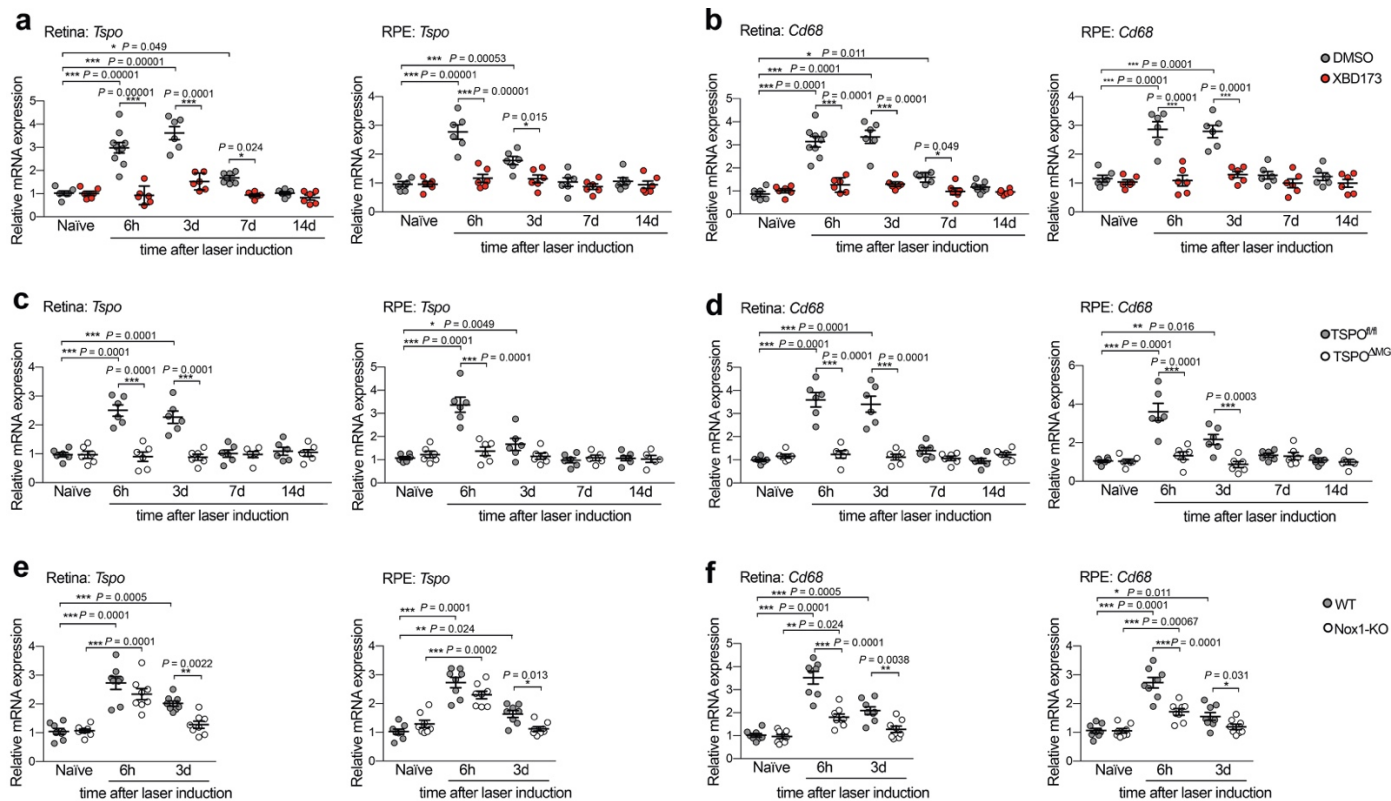

**Supplementary Figure 1: Laser-induced gene expression of *Tspo* and *Cd68*.** *Tspo* and *Cd68* mRNA levels in retina and RPE/choroid from **a, b** DMSO- or XBD173 treated mice, **c, d** TSPO<sup>fl/fl</sup> and TSPO<sup>ΔMG</sup> mice, and **e, f** WT and Nox1-KO mice at indicated time points after laser-induced CNV. Data are presented as mean ± SEM. n= 6 retinas/RPEs from individual mice, WT/Nox1-KO n= 8 retinas/RPEs from individual mice. Linear mixed model was used for statistical analyses; \* $P < 0.05$ , \*\* $P < 0.01$  and \*\*\* $P \leq 0.001$ . Source data are provided as a Source Data file.

## Supplementary Figure 2

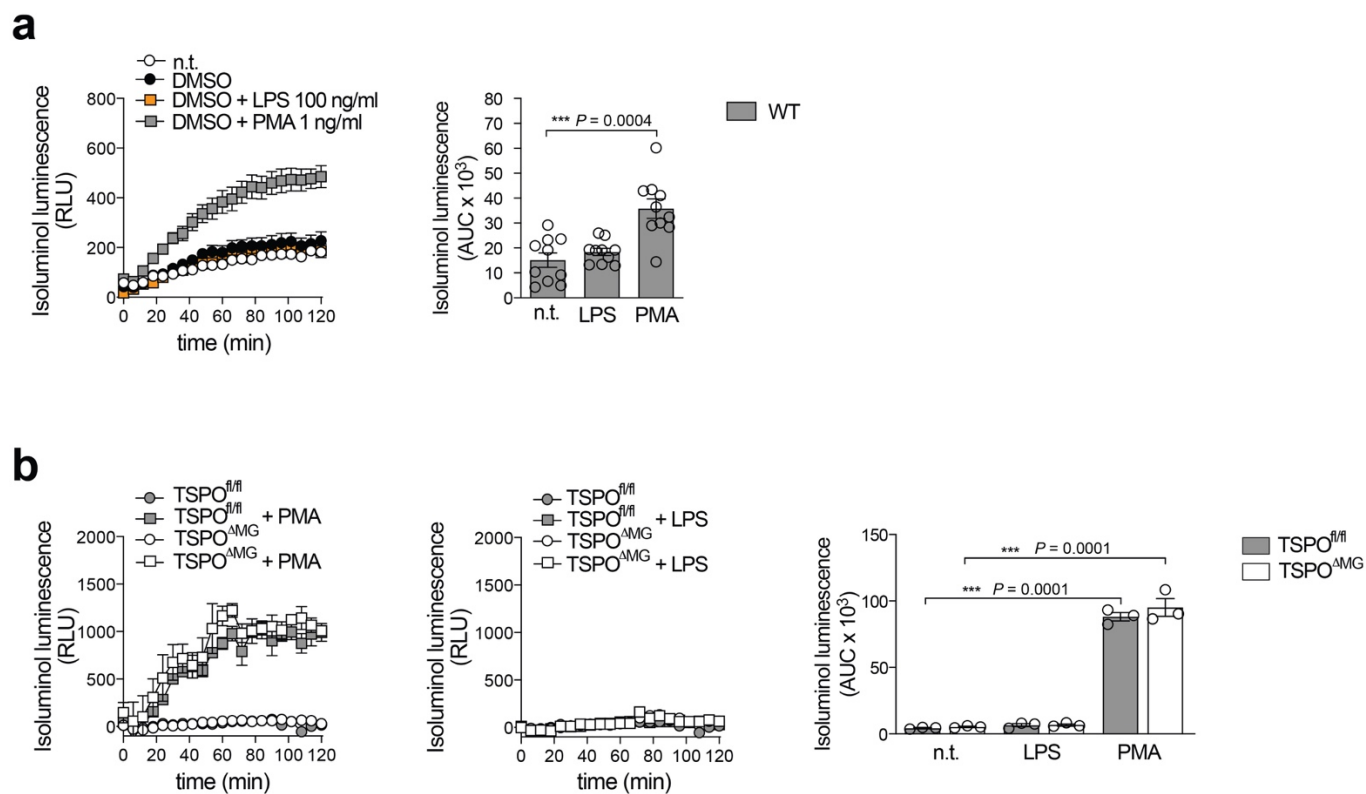

## Supplementary Figure 2: Extracellular ROS production is induced in stimulated primary microglia.

Primary microglia from WT **(a)**, TSPO<sup>fl/fl</sup> and TSPO<sup>ΔMG</sup> mice **(b)** mice were stimulated with LPS or PMA.

Kinetics of ROS production and the area under the curve (AUC) are shown. Data are presented as mean ± SEM. n= 10 (a); 3 (b) independent experiments, two-tailed unpaired Student's *t* test, \*\*\* $P \leq 0.001$ . n.t., non-treated. Source data are provided as a Source Data file.

### Supplementary Figure 3

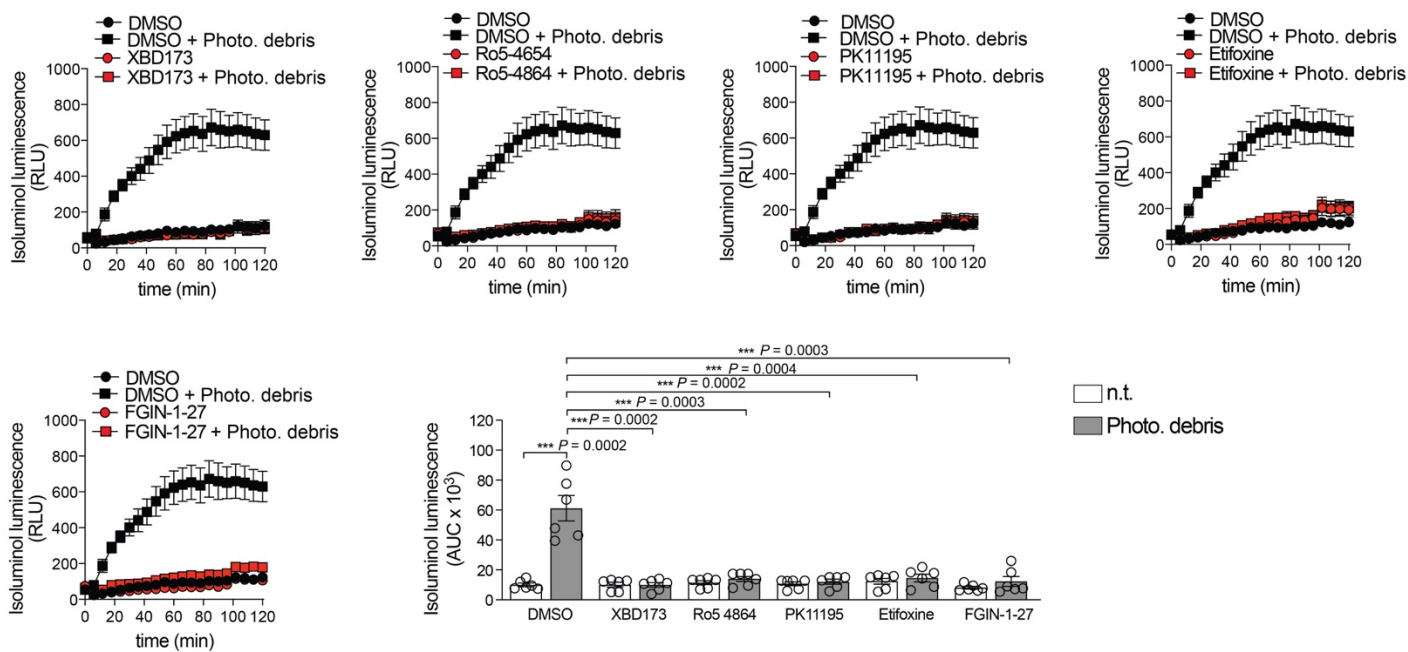

**Supplementary Figure 3: TSPO ligands reduce extracellular ROS production in stimulated primary microglia.** Primary microglia were stimulated with photoreceptor cell debris and treated with 50  $\mu$ M of different TSPO ligands. Kinetics of ROS production and the area under the curve (AUC) are shown. Data are presented as mean  $\pm$  SEM. n = 6 independent experiments, two-tailed unpaired Student's *t* test, \*\*\**P*  $\leq$  0.001. n.t., non-treated. Source data are provided as a Source Data file.

### Supplementary Figure 4

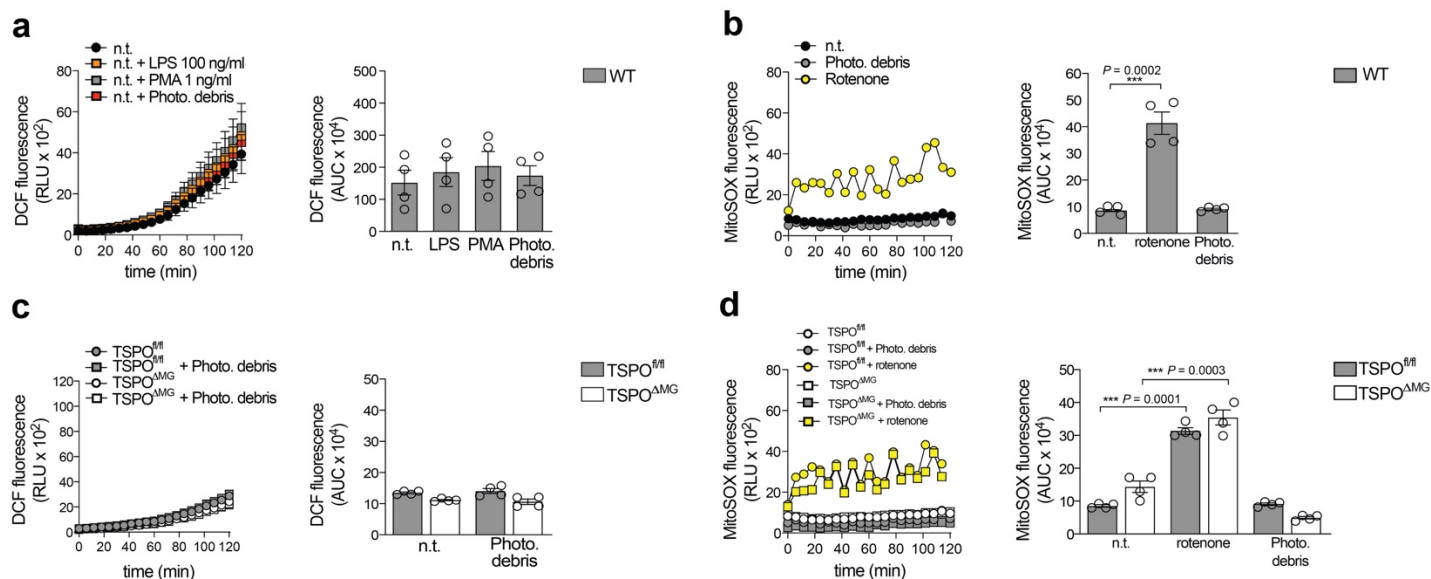

**Supplementary Figure 4: Cytosolic ROS and matrix-derived ROS production are not induced in stimulated primary microglia.** **a-d** Primary microglia were stimulated with LPS, PMA or photoreceptor cell debris. Kinetics of ROS production and the area under the curve (AUC) are shown. **a** Cytosolic ROS production; **b** matrix-derived ROS (mROS) production in WT mice. **c** Cytosolic ROS production; **d** mROS production in TSPO<sup>fl/fl</sup> and TSPO<sup>AMG</sup> mice. Where indicated, ROS production into the mitochondrial matrix was induced with rotenone as a positive control. Data are presented as mean ± SEM. n= 4 independent experiments, two-tailed unpaired Student's *t* test, \*\*\**P* ≤ 0.001. n.t., non-treated. Source data are provided as a Source Data file.

## Supplementary Figure 5

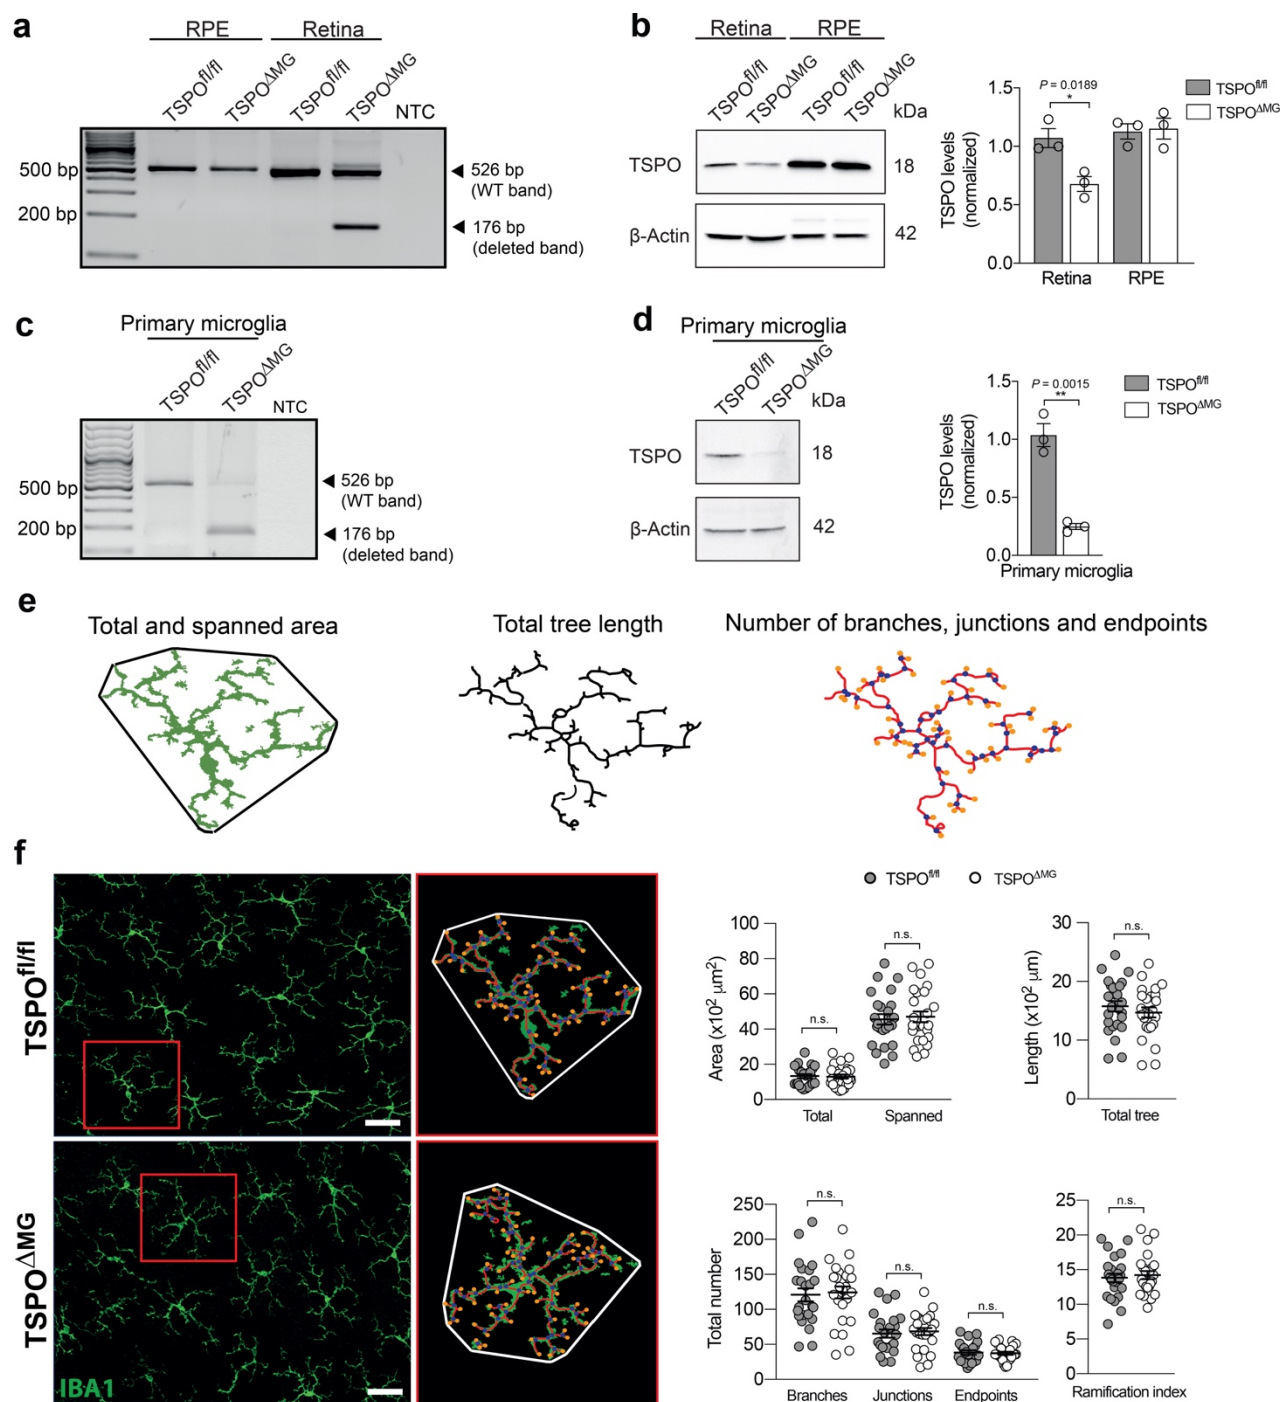

**Supplementary Figure 5: Microglia of TSPO-KO mice exhibit a normal phenotype.** **a-d** Validation of TSPO-KO in retina and RPE/choroid (**a, b**) and primary microglia (**c, d**). **a, c** Genomic PCR products spanning exon 1 and 4 of *Tspo*. WT band, 526 bp; *Tspo* deleted band, 176 bp; NTC, no template control. **b, d** TSPO protein levels and densitometric analysis of Western blots. TSPO signals were normalized to  $\beta$ -Actin.  $n = 3$  retinas/RPEs from individual mice of three independent experiments. **e** Analysis of microglia phenotype in retinal flat mounts. Three morphological parameters were analyzed: 1) total (area of green

arbor) and spanned area (area circumscribed by the polygonal object defined by connecting the outer points of the dendritic arbor (green)); 2) total tree length (sum of all dendritic segments identified in the skeletonized arbor); 3) number of branches (blue dots), junctions (points where more than two branches meet, blue dots) and endpoints (orange dots) (identified in a skeletonized rendition of the arbor). **f** Skeleton analysis of microglia morphologies in Iba1-stained retinal flat mounts. Scale bar: 50  $\mu\text{m}$ . Original photomicrographs (left panel) and skeletons (green) with associated convex hulls (white polygonal) (right panel).  $n = 25$  microglia cells from individual retinas of three independent experiments. Data are presented as mean  $\pm$  SEM; two-tailed unpaired Student's  $t$  test,  $*P \leq 0.05$  and  $**P \leq 0.01$ . n.s., not significant. Source data are provided as a Source Data file.

## Supplementary Figure 6

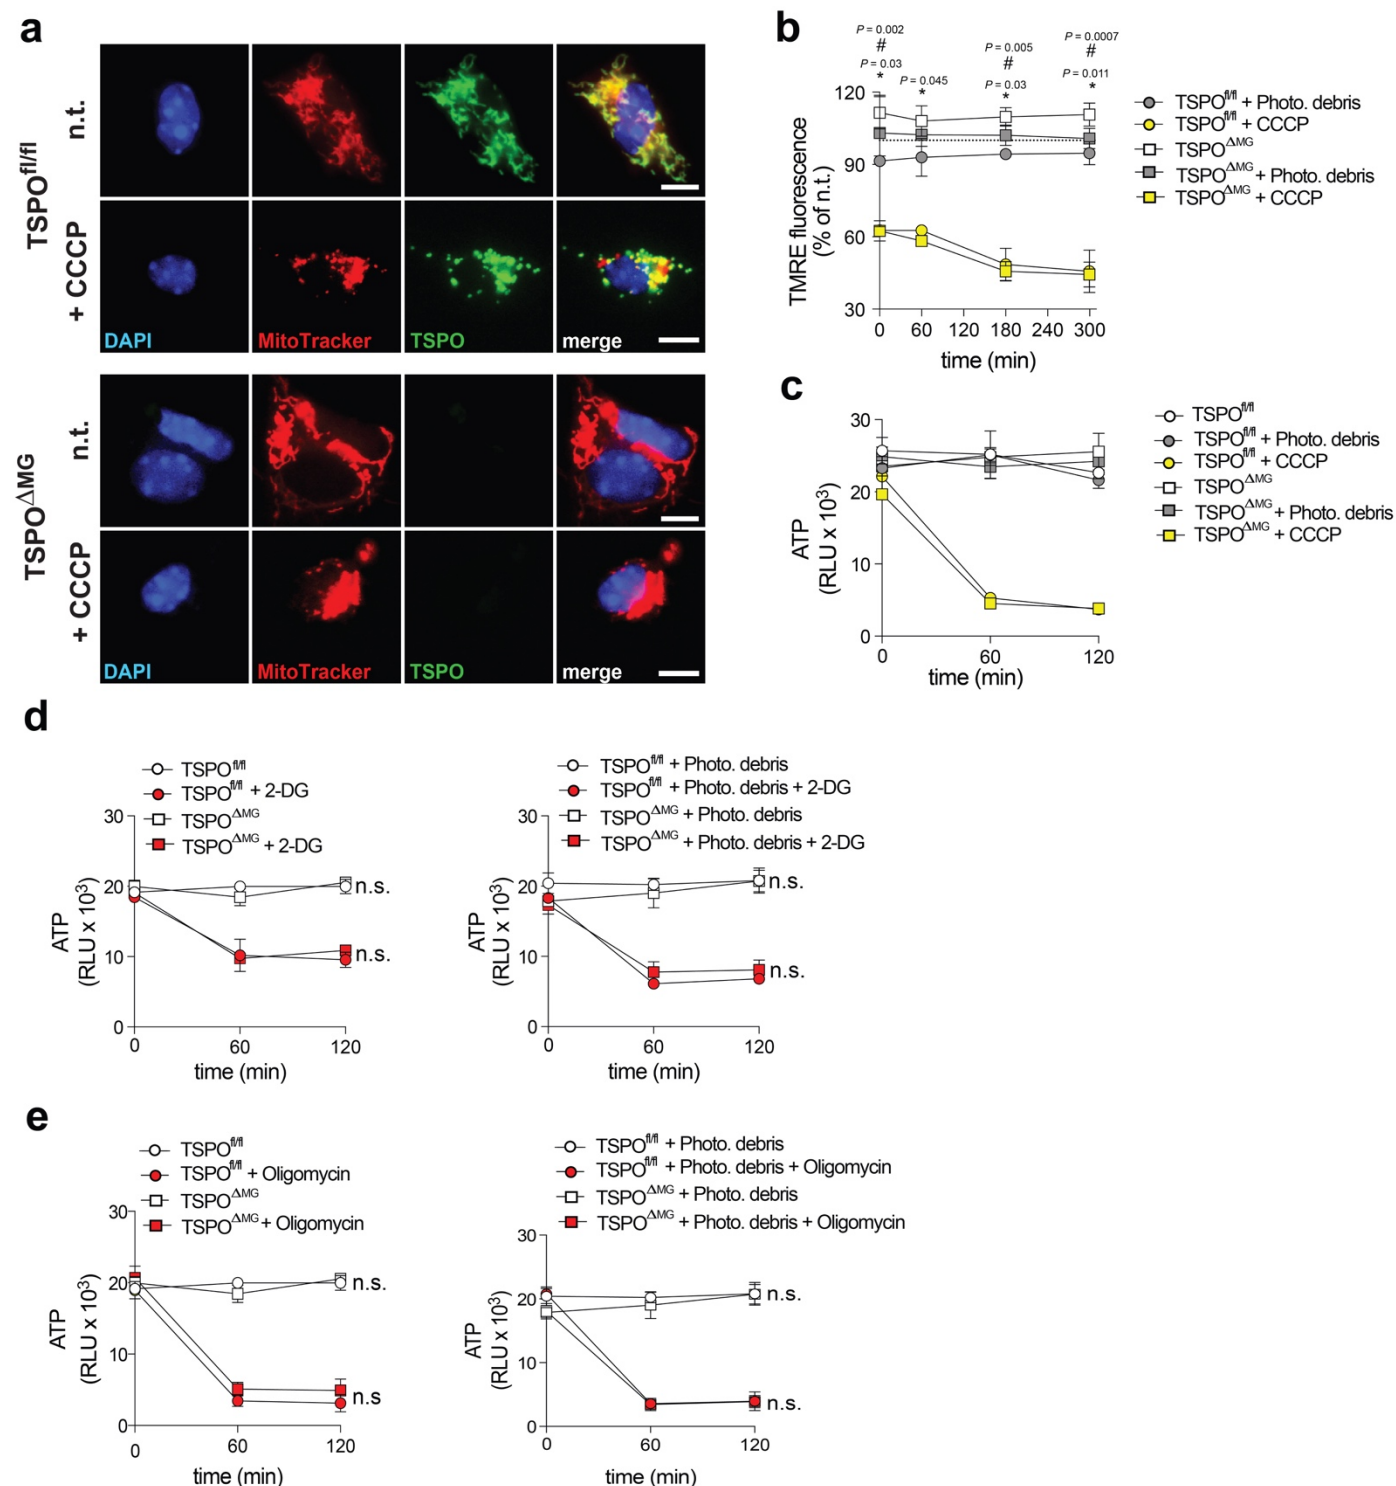Supplementary Figure 6: TSPO-KO microglia exhibit a normal energy homeostasis. **a**

Representative images of TSPO- and Mitotracker Red-stained mitochondria in TSPO<sup>fl/fl</sup> and TSPO<sup>ΔMG</sup> primary microglia. Nuclei were counterstained with DAPI. Scale bar: 6 μm. **b** Analysis of mitochondrial membrane potential in TSPO<sup>fl/fl</sup> and TSPO<sup>ΔMG</sup> primary microglia. Where indicated, TSPO<sup>fl/fl</sup> and TSPO<sup>ΔMG</sup> primary microglia were stimulated with photoreceptor cell debris and mitochondrial membrane potential was impaired with CCCP as a positive control. n = 4 independent experiments; **c-e** Analysis of total ATP levels.



Where indicated, primary microglia from TSPO<sup>fl/fl</sup> and TSPO<sup>ΔMG</sup> mice were stimulated with photoreceptor cell debris and treated either with 200 μM CCCP (**c**) to impair the mitochondrial membrane potential, 500 μM 2-Deoxy-D-glucose (2-DG) to inhibit glycolysis (**d**) or 10 μM oligomycin to inhibit complex V of the ETC (**e**). n= 3 independent experiments. Data are presented as mean ± SEM; two-tailed unpaired Student's *t* test; \**P*< 0.01 when TSPO<sup>fl/fl</sup> compared to TSPO<sup>fl/fl</sup> + Photo. debris; #*P*< 0.01 when TSPO<sup>fl/fl</sup> compared to TSPO<sup>ΔMG</sup>. n.s., not significant. n.t., non-treated. Source data are provided as a Source Data file.

## Supplementary Figure 7

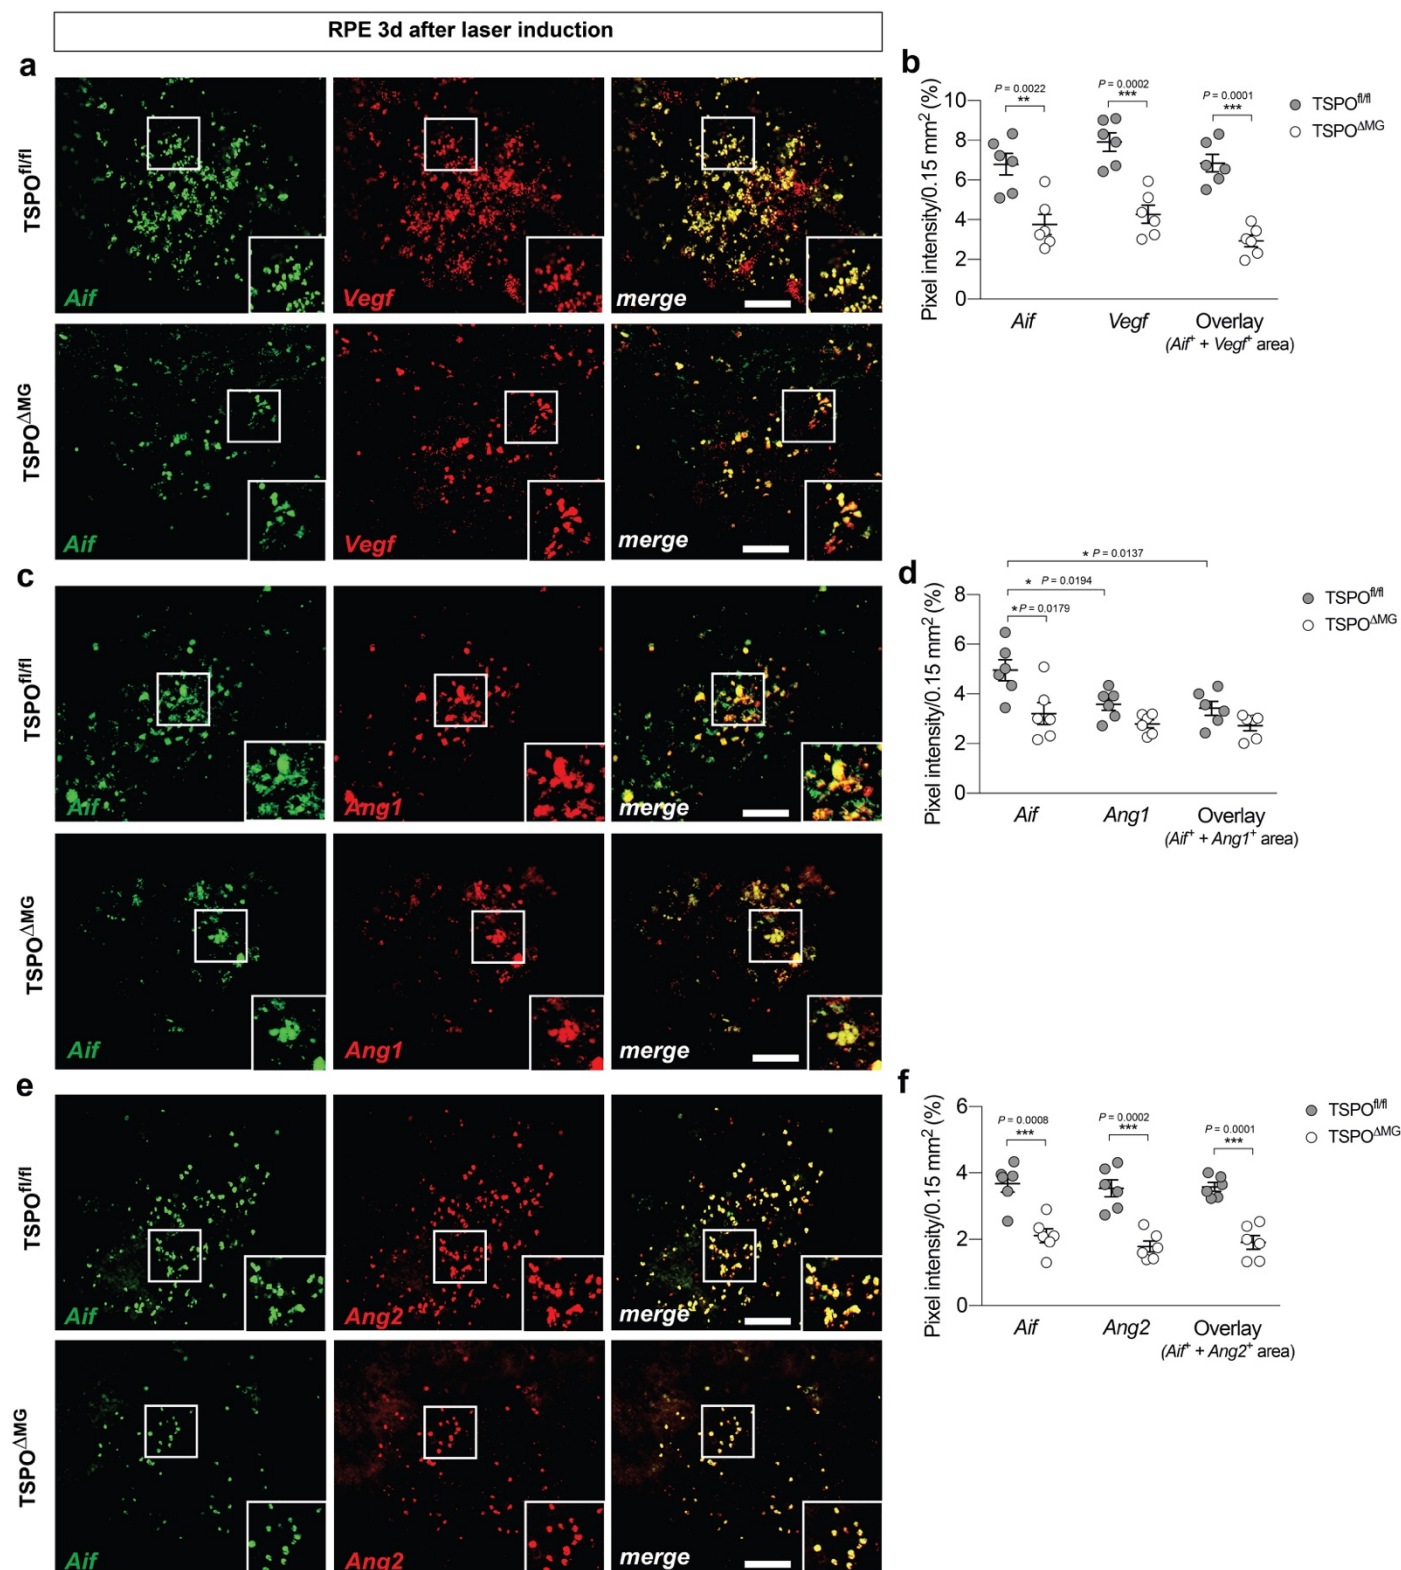

**Supplementary Figure 7: Reactive mononuclear phagocytes express *Vegf*, *Ang1* and *Ang2* mRNAs in laser lesions.** Representative images of *in situ* hybridization of individual laser lesions in RPE/choroidal flat mounts of TSPO<sup>fl/fl</sup> and TSPO<sup>ΔMG</sup> mice at 3 days post laser using mRNA probes for *Aif* to label MNPs in combination with *Vegf* (a), *Ang1* (c), *Ang2* (e). Scale bar: 50 μm. Inlays show higher magnification.

Analysis of *in situ* hybridization signals of *Aif* together with *Vegf* (**b**), *Ang1* (**d**) and *Ang2* (**f**) per laser spot in RPE/choroidal flat mounts 3 days after laser coagulation by quantifying the percentage of colored pixels per area. Data are presented as mean  $\pm$  SEM. n= 6 laser spots; two-tailed unpaired Student's *t* test, \**P*< 0.05, \*\**P*< 0.01 and \*\*\**P*≤ 0.001. *Aif*, Allograft inflammatory factor 1. Source data are provided as a Source Data file.

## Supplementary Figure 8

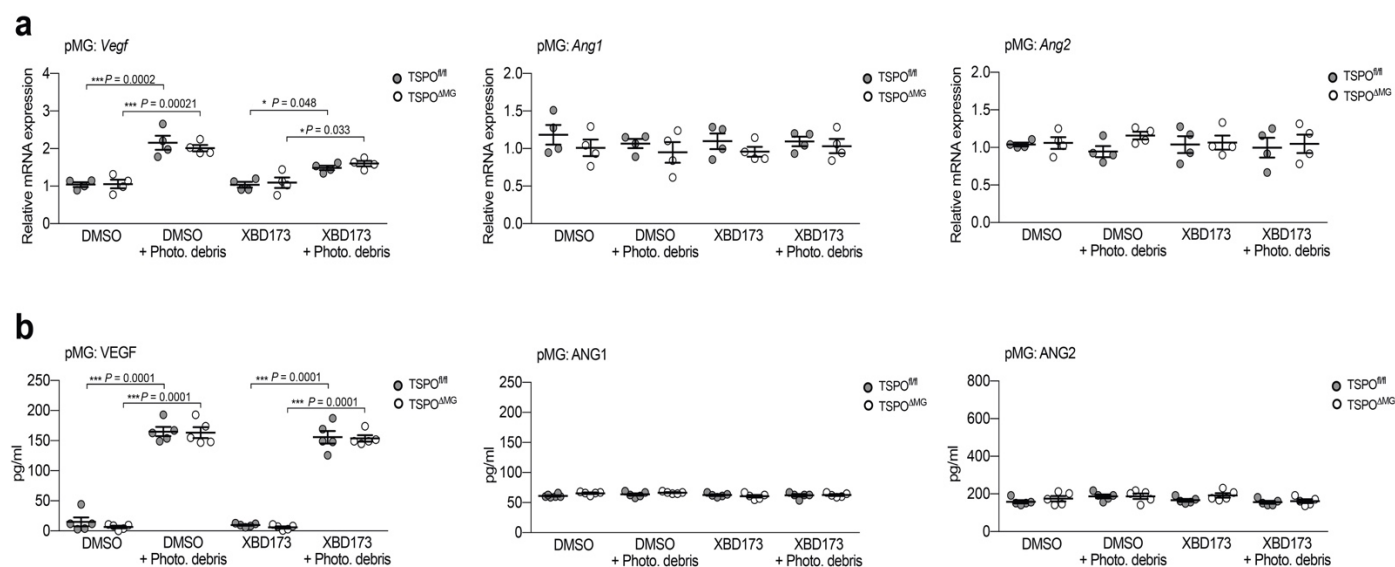

**Supplementary Figure 8: Stimulated primary microglia show increased levels of VEGF but not ANG1 and ANG2.** **a** *Vegf*, *Ang1* and *Ang2* mRNA levels in pMG from  $TSPO^{fl/fl}$  and  $TSPO^{\Delta MG}$  mice 6h after stimulation with photoreceptor cell debris.  $n=4$  independent experiments. Linear mixed model was used for statistical analyses;  $*P < 0.05$  and  $***P \leq 0.001$ . **b** Pro-angiogenic growth factor levels in pMG from  $TSPO^{fl/fl}$  and  $TSPO^{\Delta MG}$  mice 6h after stimulation with photoreceptor cell debris.  $n=5$  independent experiments. Data are presented as mean  $\pm$  SEM. Linear mixed model was used for statistical analyses;  $***P \leq 0.001$ . Source data are provided as a Source Data file.

## Supplementary Figure 9

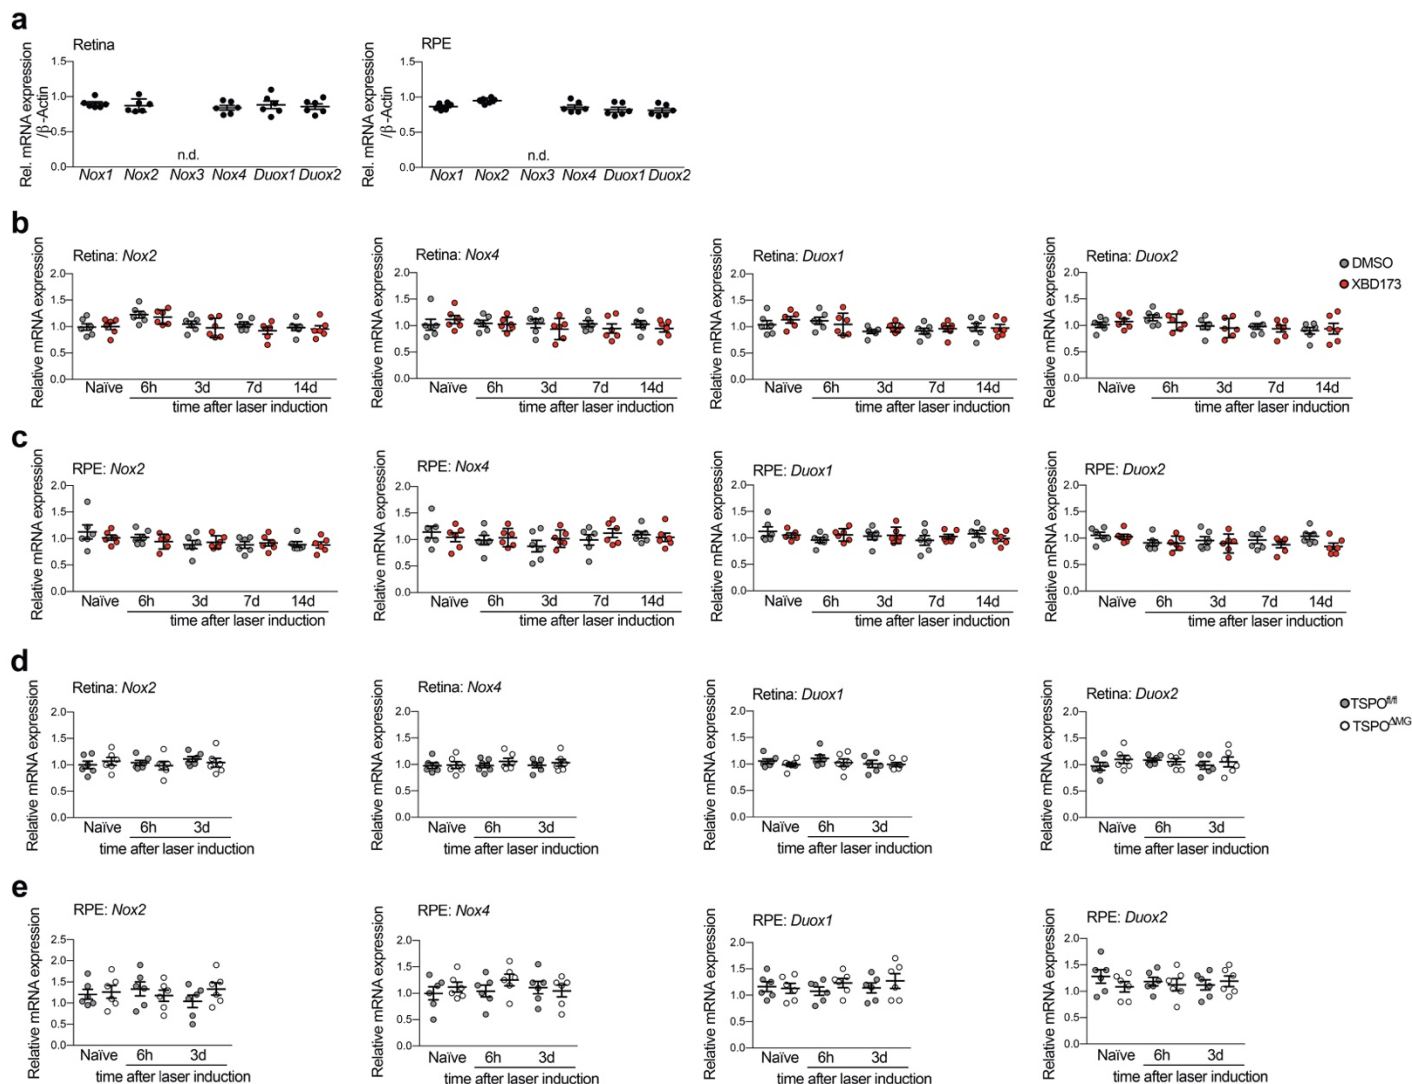

**Supplementary Figure 9: NADPH oxidase (NOX) family enzymes *Nox2*, *Nox4*, *Duox1* and *Duox2* do not show a laser-induced gene expression in mice.** **a** Relative expression of NOX family members in WT retina and RPE/choroid. Transcript levels for each enzyme were normalized to  $\beta$ -Actin. **b, c** Relative expression of NOX family members in the retina (**b**) and RPE/choroid (**c**) after laser-induced CNV in DMSO- or XBD173-treated mice. **d, e** Relative expression of NOX family members in the retina (**d**) and RPE/choroid (**e**) after laser-induced CNV in *TSPO<sup>fl/fl</sup>* and *TSPO<sup>ΔMG</sup>* mice. Data are presented as mean  $\pm$  SEM.  $n = 6$  retinas/RPEs from individual mice. Linear mixed model was used for statistical analyses. N.d., not detected. Source data are provided as a Source Data file.

## Supplementary Figure 10

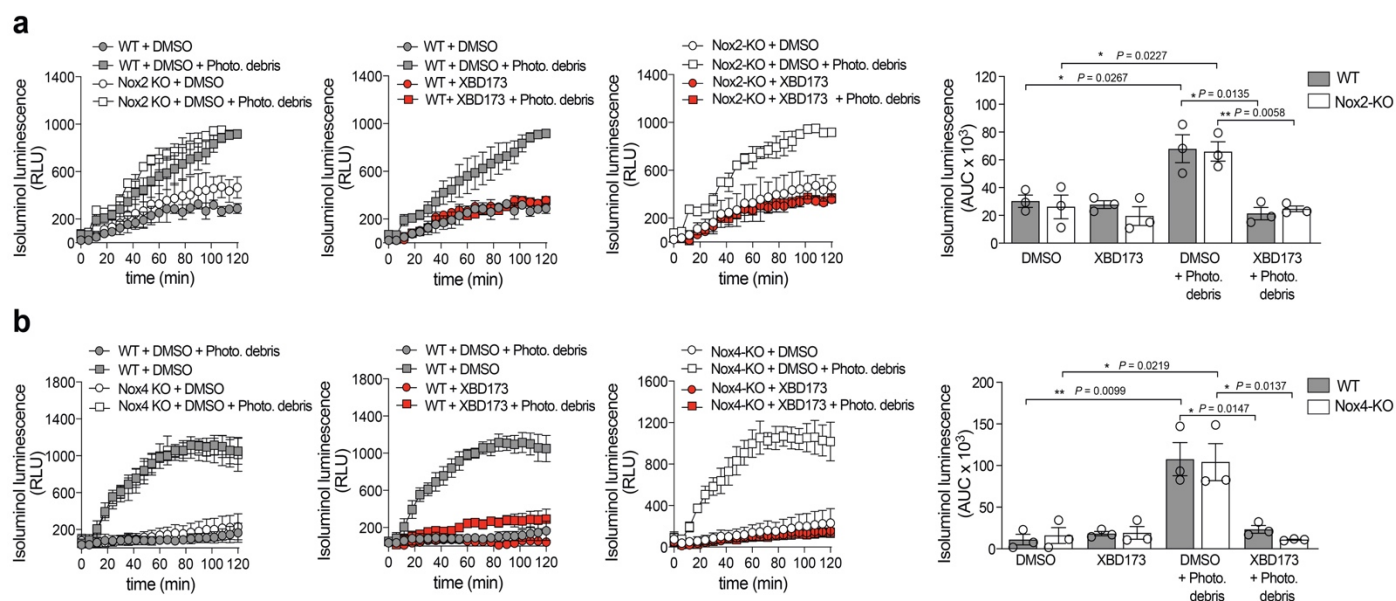

**Supplementary Figure 10: Photoreceptor cell debris does not induce ROS production by NOX2 and NOX4. a** Quantification of extracellular ROS production by primary microglia from WT and Nox2-KO mice. **b** Quantification of extracellular ROS production by primary microglia from WT and Nox4-KO mice. Kinetics of ROS production and the area under the curve (AUC) are shown. Data are presented as mean  $\pm$  SEM.  $n = 3$  independent experiments, two-tailed unpaired Student's  $t$  test, \* $P < 0.05$  and \*\*  $P < 0.01$ . Source data are provided as a Source Data file.

## Supplementary Figure 11

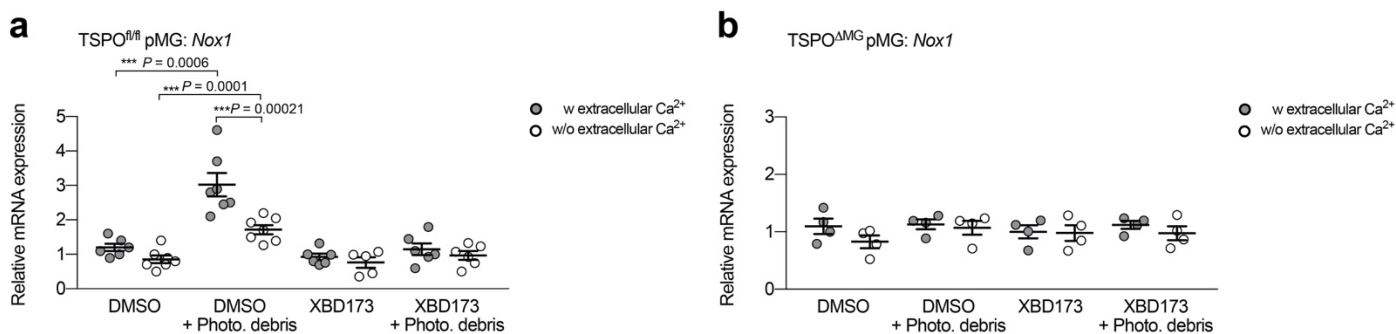

**Supplementary Figure 11: Lack of extracellular Ca<sup>2+</sup> reduces expression of *Nox1* in primary microglia.** *Nox1* mRNA levels in levels in pMG from TSPO<sup>fl/fl</sup> (a) and TSPO<sup>ΔMG</sup> (b) mice 6h after stimulation with photoreceptor cell debris in the presence or absence of extracellular Ca<sup>2+</sup>. Data are presented as mean ± SEM. n= 6 for TSPO<sup>fl/fl</sup> pMG and n= 4 independent experiments for TSPO<sup>ΔMG</sup> pMG. Linear mixed model was used for statistical analyses, \*\*\* $P \leq 0.001$ . W/o; without; w, with. Source data are provided as a Source Data file.

## Supplementary Figure 12

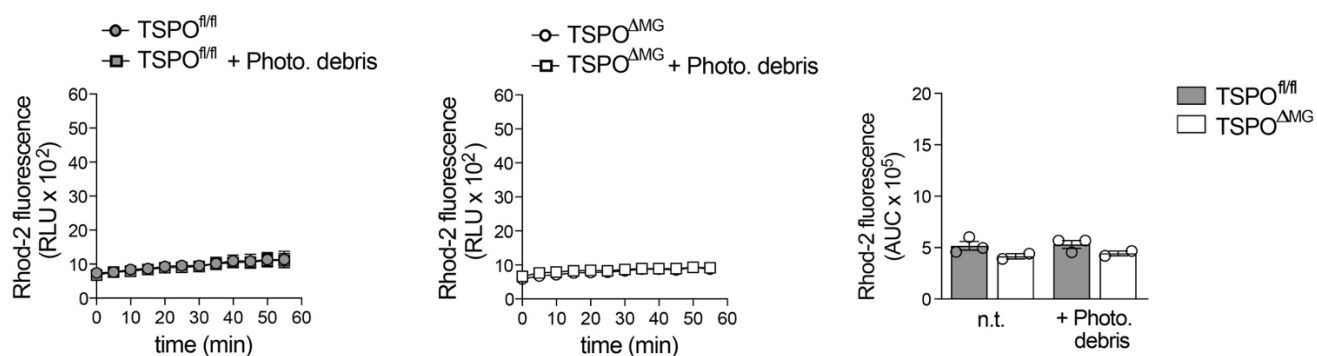Supplementary Figure 12: Photoreceptor cell debris does not increase mitochondrial Ca<sup>2+</sup> levels.

Quantification of mitochondrial calcium levels in primary microglia from TSPO<sup>fl/fl</sup> and TSPO<sup>ΔMG</sup> mice. Where indicated, primary microglia were stimulated with photoreceptor cell debris. Kinetics of calcium measurements and the area under the curve (AUC) are shown. Data are presented as mean ± SEM. n= 3 independent experiments, two-tailed unpaired Student's *t* test. Source data are provided as a Source Data file.



# Supplementary Figure 13

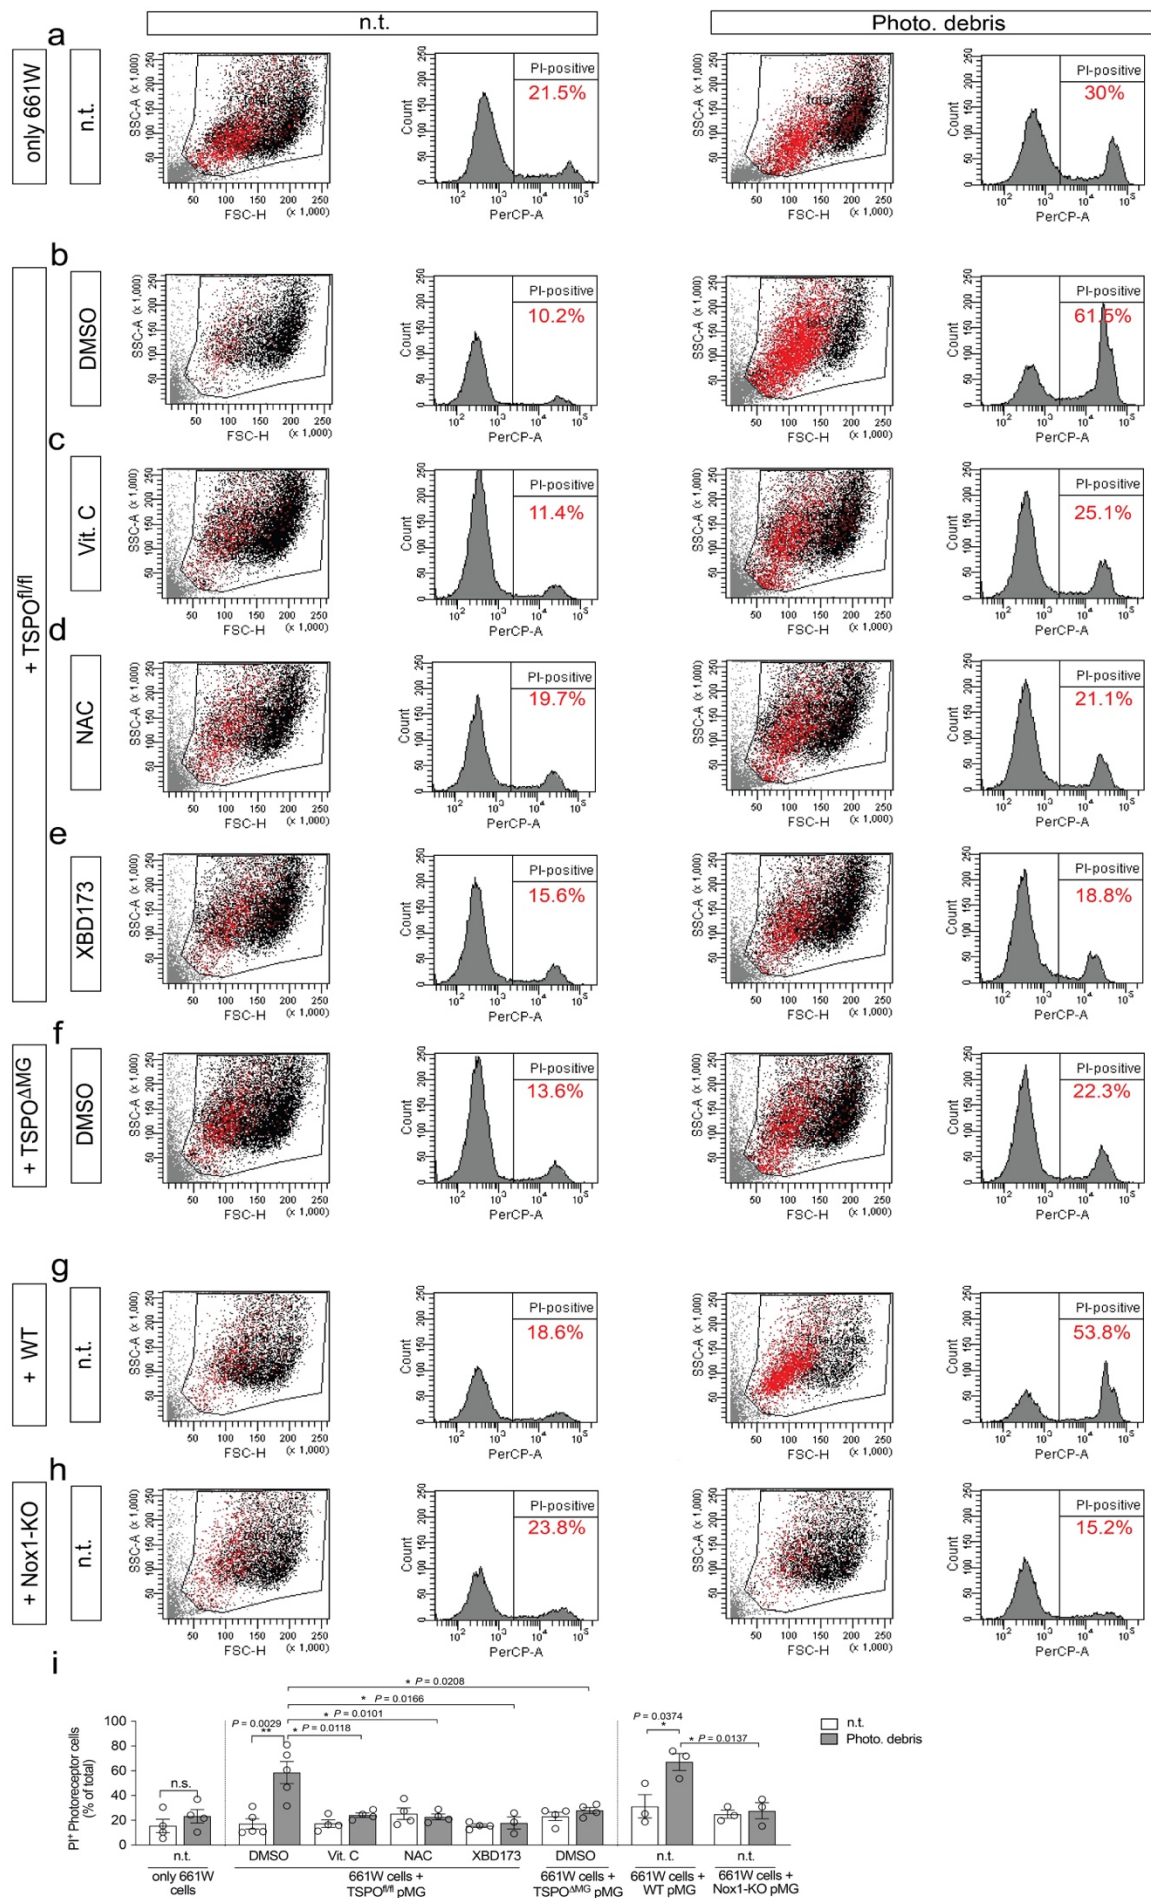

**Supplementary Figure 13: Extracellular ROS damage photoreceptor cells in a paracrine manner.**

ROS-induced cell death of 661W photoreceptor cells alone **(a)** or in co-culture with microglia **(b-h)** was determined by analyzing the percentage of PI<sup>+</sup>-photoreceptor cells isolated from the trans-well inlays. Photoreceptor cells and microglia were unstimulated (right panel) or treated with photoreceptor cell debris (right panel) to induce ROS production in microglia. Photoreceptor cells were co-cultured with TSPO<sup>fl/fl</sup> microglia treated with the vehicle control **(b)** or with TSPO<sup>fl/fl</sup> microglia in medium with Vitamin C (Vit. c) **(c)**, NAC **(d)** or XBD173 **(e)** or with TSPO<sup>ΔMG</sup> microglia **(f)**. Photoreceptor cells were co-cultured with corresponding WT microglia **(g)** or Nox1-KO microglia **(h)**. Bar chart showing the quantification of photoreceptor cell death **(i)**. 5,000 cells were counted per sample. Gating strategy: detached 661W photoreceptor cells were gated based on FSC-H/SSC-A to exclude cell debris. Cell death in the gated population was analyzed by detection of PI-positive 661W photoreceptor cells based on PerCP-A fluorescence. In each experiment 661W photoreceptor cells cultured alone served as negative control groups. Data are shown as mean ± SEM, n= 4 independent experiments (TSPO<sup>fl/fl</sup> DMSO n= 5; XBD173 + Photo. debris n= 3; Nox1 WT and KO n= 3 independent experiments), two-tailed unpaired Student's *t* test, \**P* ≤ 0.05 and \*\**P* ≤ 0.01. n.s, not significant; n.t. = non-treated. Source data are provided as a Source Data file.
